# Supplementary material
Source: PubMed Central journal article supplement (PMC4262343)

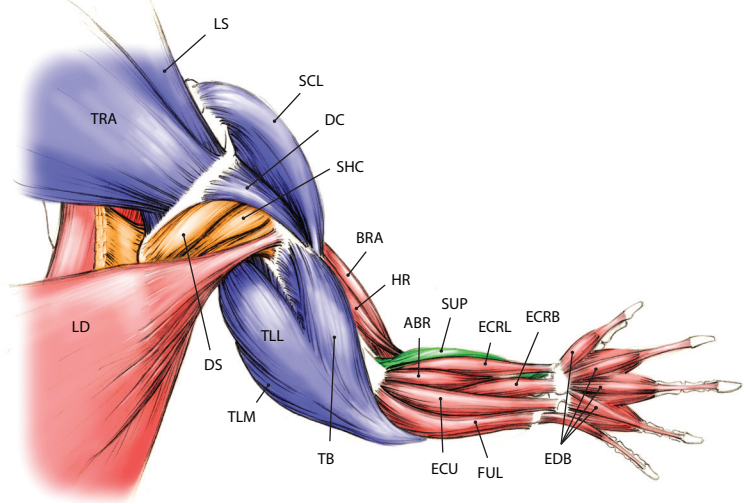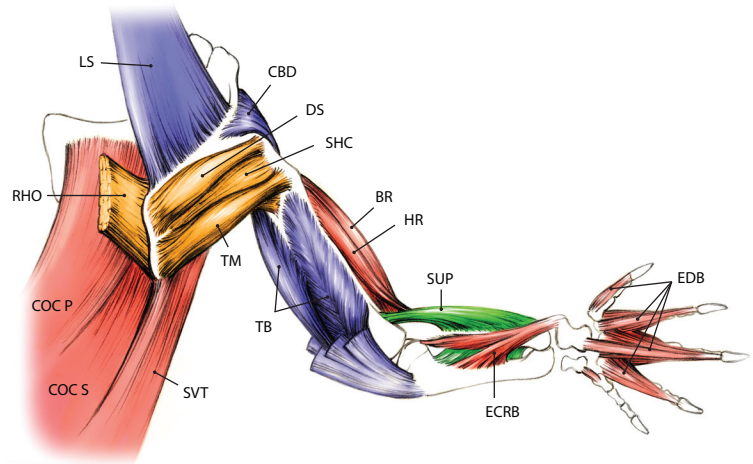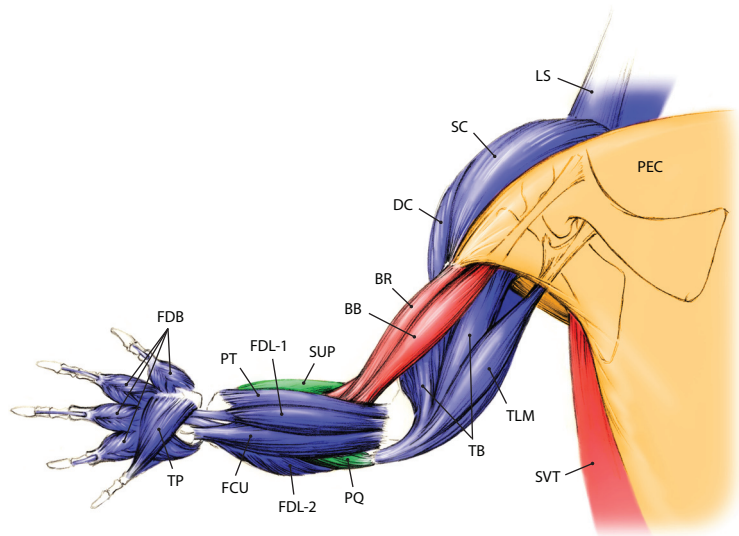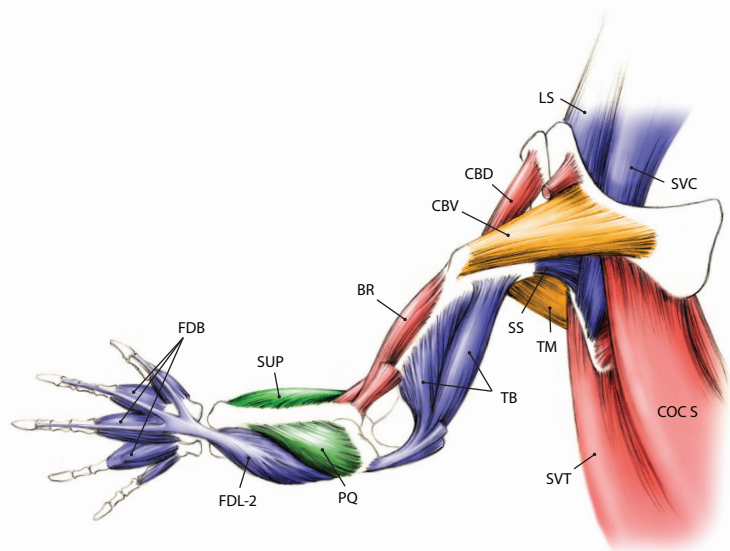

Supplement: joa0225-0569-sd6.pdf [file joa0225-0569-sd6.pdf]
